# Supplementary material for: Range, routing and kinetics of rod signaling in primate retina
Source: eLife. 2018 Oct 9;7:e38281. doi: 10.7554/eLife.38281 (PMC6218188; doi:10.7554/eLife.38281)
Supplement: Figure 2—source data 1. [file elife-38281-fig2-data1.xlsx]

## Sheet: Sheet1
		Fig 2B
		intensity	fractional suppression
		20	0.3075
		40	0.449
		80	0.625
		160	0.824
		320	0.94
		640	1
		Fig 2D
		parasol_intensity	parasol_gain	rod_intensity	rod_gain	midget_intensity	midget_gain
		0.33	1	0.3	1	0.33	1.06282
		0.99	0.718211	1	0.91	0.99	0.644062
		3.3	0.407334	3	0.7606	3.3	0.287975
		9.9	0.158821	10	0.41	9.9	0.135219
		33	0.0550652	30	0.2476	33	0.0393505
		88.11	0.0176598	100	0.082	88.11	0.00777877
		293.7	0.00146573	300	0.0096	293.7	0.000792141
		881.1	0.00035159	1000	0.0003	881.1	0.000115587
