# Supplementary material for: Range, routing and kinetics of rod signaling in primate retina
Source: eLife. 2018 Oct 9;7:e38281. doi: 10.7554/eLife.38281 (PMC6218188; doi:10.7554/eLife.38281)
Supplement: Figure 3—source data 1. [file elife-38281-fig3-data1.xlsx]

## Sheet: Sheet1
		Fig 3C
		intensity	NBQX_insensitive_response	control_response
		3	0.037906	1.07279
		30	0.121681	0.977792
		300	0.74828	0.537053
		2000	1	1
		Fig 3E
		intensity	horizontal_response	cone_response
		3	0.058996	0.108037
		30	0.175501	0.189473
		300	0.564597	0.386793
		2000	1	1
