# Supplementary material for: Range, routing and kinetics of rod signaling in primate retina
Source: eLife. 2018 Oct 9;7:e38281. doi: 10.7554/eLife.38281 (PMC6218188; doi:10.7554/eLife.38281)
Supplement: Figure 4—source data 1. [file elife-38281-fig4-data1.xlsx]

## Sheet: Sheet1
		Fig 4A
		mouse_intensity	mouse_rod_fractional_suppression	primate_intensity	primate_rod_fractional_suppression
		0.31623	0.0229284	4.5	0.09
		0.5757	-0.0598141	10	0.185
		1	-0.130804	20	0.3075
		1.797	0.0354152	40	0.449
		3.62129	0.0413517	80	0.625
		10.4413	0.0803432	160	0.824
		31.8401	0.217385	320	0.94
		97.06	0.422683	640	1
		306.826	0.645239
		508	0.848159
		1000	0.926747
		1602	0.957967
		Fig 4B
		mouse_intensity	mouse_AII	primate_intensity	primate_AII
		0.5	0.104849	3	0.037906
		2.25	0.315225	30	0.121681
		10	0.743746	300	0.74828
		45	0.996201	2000	1
		100	1.06137
		200	1
		Fig 4D
		mouse_intensity	mouse_HC	primate_intensity	primate_HC
		0.3	0.178596	3	0.058996
		3	0.360364	30	0.175501
		30	0.830545	300	0.564597
		300	1.11894	2000	1
		2000	1
