# Supplementary material for: Range, routing and kinetics of rod signaling in primate retina
Source: eLife. 2018 Oct 9;7:e38281. doi: 10.7554/eLife.38281 (PMC6218188; doi:10.7554/eLife.38281)
Supplement: Figure 5—source data 1. [file elife-38281-fig5-data1.xlsx]

## Sheet: Sheet1
		Fig 5B
		frequency	cone_parasol_amps	rod_parasol_amps
		2	1.6825	0.2525
		4	1.4275	0.11
		6	0.965	0.03
		10	0.555	0.00725
		20	0.2	0.01
		Fig 5D
		frequency	cone_HC_amps	rod_HC_amps
		2	552.55	651.2
		4	365.2	470.95
		6	236.35	241.6
		10	204.7	34.3
		20	42.7	2
