# Supplementary material for: Range, routing and kinetics of rod signaling in primate retina
Source: eLife. 2018 Oct 9;7:e38281. doi: 10.7554/eLife.38281 (PMC6218188; doi:10.7554/eLife.38281)
Supplement: Figure 6—source data 1. [file elife-38281-fig6-data1.xlsx]

## Sheet: Sheet1
		Fig 6C
		cell type	RodAmp/ConeAmp
		OnP	1
		OnM	1.33
		OffP	0.44
		OffM	0.48
		Fig 6F
		mouse intensity	mouse amp	primate intensity	primate amp
		0.49	0.097	2	0.09
		4.9	0.63	20	0.18
		49	1	200	0.8
