# Supplementary material for: Range, routing and kinetics of rod signaling in primate retina
Source: eLife. 2018 Oct 9;7:e38281. doi: 10.7554/eLife.38281 (PMC6218188; doi:10.7554/eLife.38281)
Supplement: Figure 7—source data 1. [file elife-38281-fig7-data1.xlsx]

## Sheet: Sheet1
		Fig 7C
		intensity	time shift excitation	time shift spikes
		0.0216	0	0
		0.0755	0.1519	-5.75466
		0.2531	-2.3709	-7.55343
		0.5691	-5.7032	-10.4824
		1.2073	-14.7919	-14.1965
		2.3502	-25.1146	-29.713
		4.6778	-30.4551	-36.5753
		8.7629	-45.548	-42.9165
		18.5375	-69.1683	-65.9589
		48.36	-79.7464	-80.5072
		85	-104.721	-85.7043
		Fig 7F
		photocurrent_intensity	time shift photocurrent	photovoltage_intensity	time shift photovoltage
		0.2	0	1	-10
		0.6	-2.5308	20	-57.1
		2	-7.0006	60	-87.6
		6	-12
		20	-22
		60	-37
		Fig 7I
		voltage	zero crossing time
		-68.2325	22.44
		-62.7033	22.425
		-57.8601	31.2
		-52.1797	39.4
		-48.4952	47.2
		-40.9955	46.05
