# Supplementary material for: Range, routing and kinetics of rod signaling in primate retina
Source: eLife. 2018 Oct 9;7:e38281. doi: 10.7554/eLife.38281 (PMC6218188; doi:10.7554/eLife.38281)
Supplement: Figure 8—source data 1. [file elife-38281-fig8-data1.xlsx]

## Sheet: Sheet1
	Fig 8A
	intensity	integration time
	0.33	93.161
	0.99	88.8286
	3.3	89.4253
	9.9	76.8518
	33	61.1927
	99	35.5677
	294	32.5213
	881	25.0832
