# Supplementary figures and images for: Range, routing and kinetics of rod signaling in primate retina
Source: eLife journal article supplement (doi:10.7554/elife.38281), 2018-10-09

Dark

3 R\*/rod/s

30 R\*/rod/s

300 R\*/rod/s

**H1 Horizontal**  
(cone synaptic output)

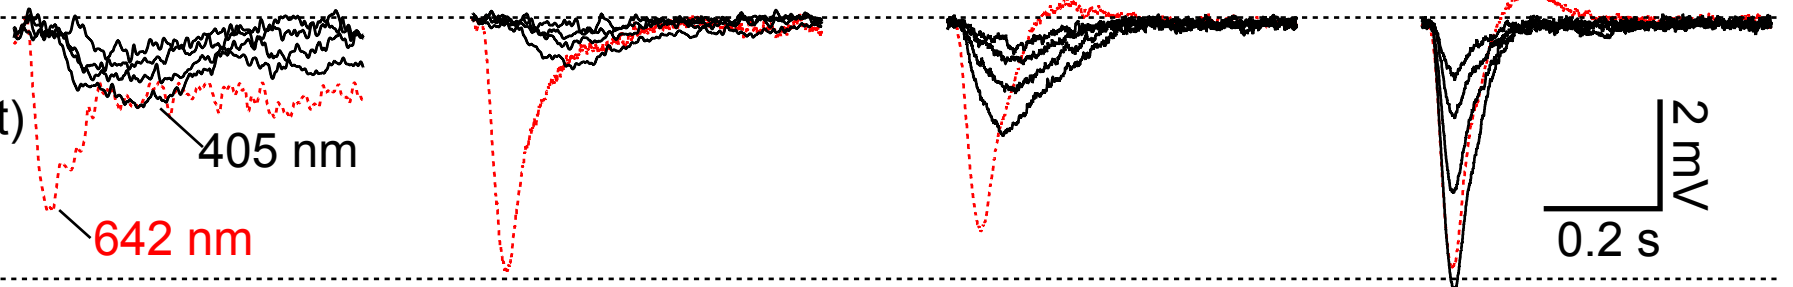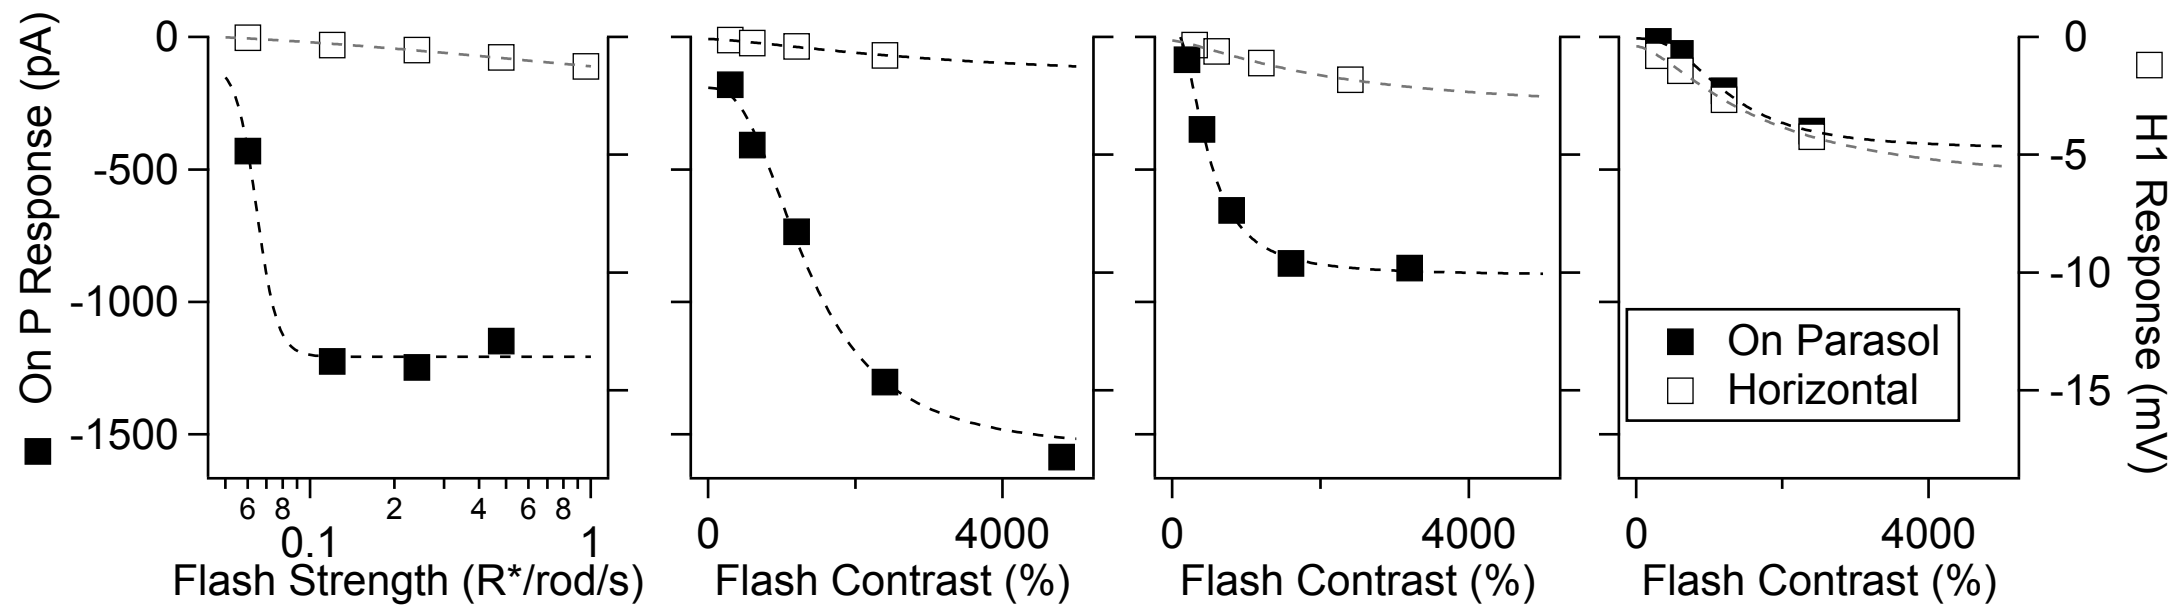

**On Parasol**  
(retinal output)

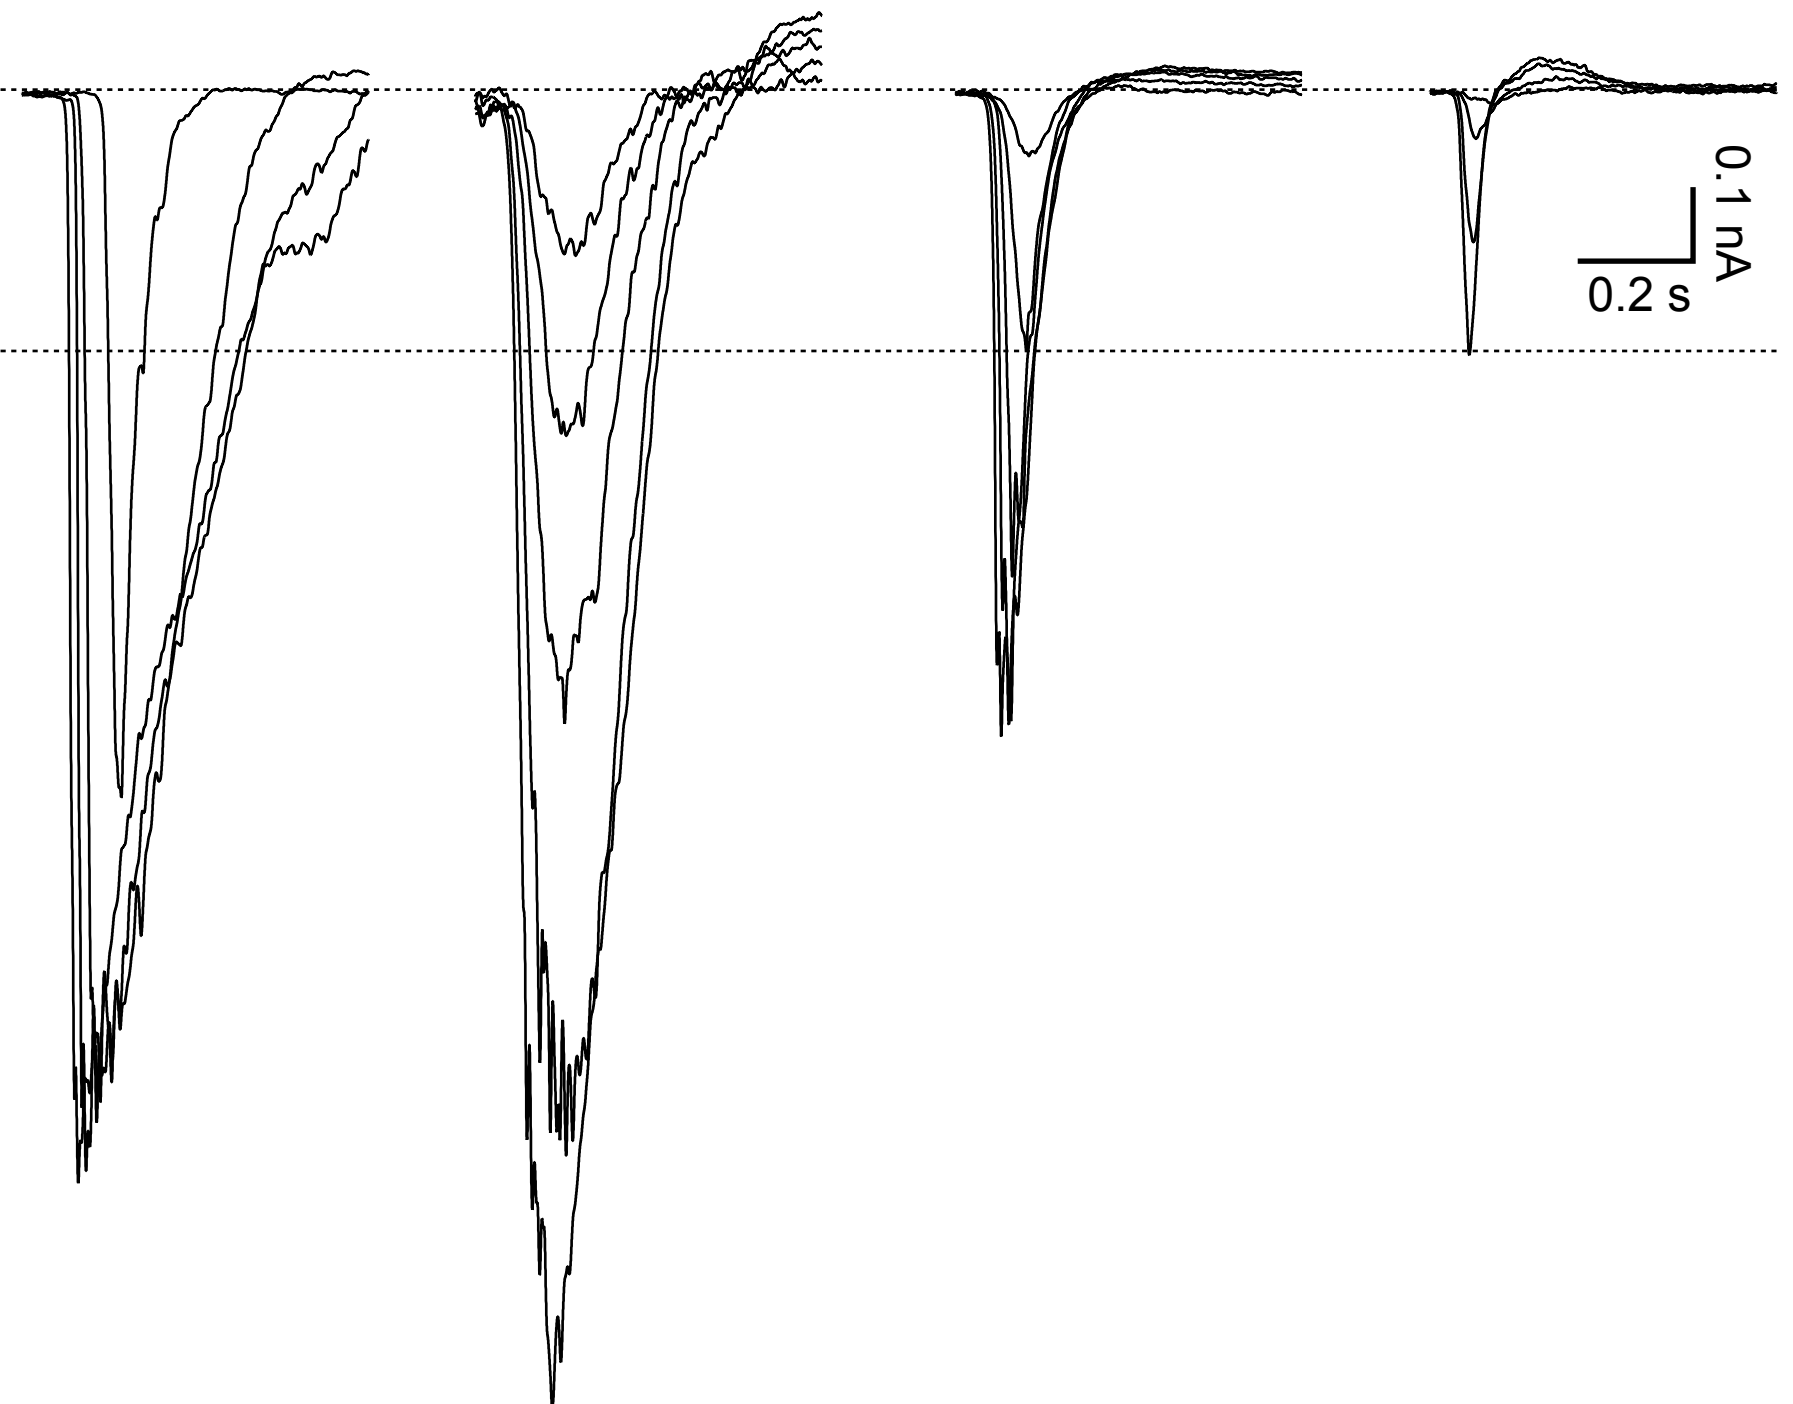

Supplement: supp [file elife-38281-supp-v1.zip]

## A. Responses to 15 Hz flicker

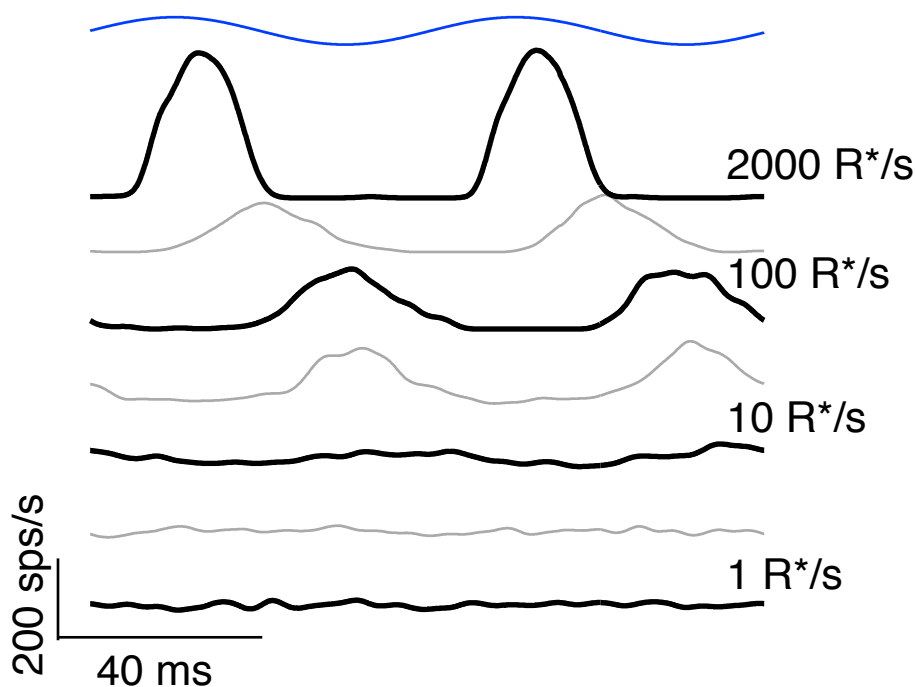

## B. Intensity-dependent frequency tuning

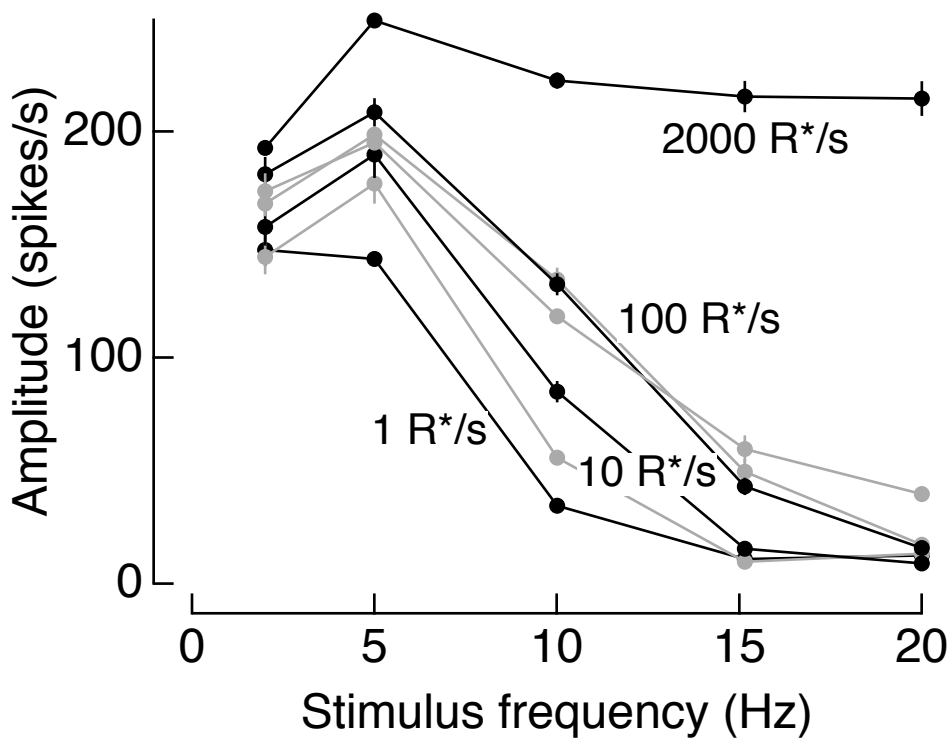

Supplement: supp [file elife-38281-supp-v1.zip]

A. Rod-derived

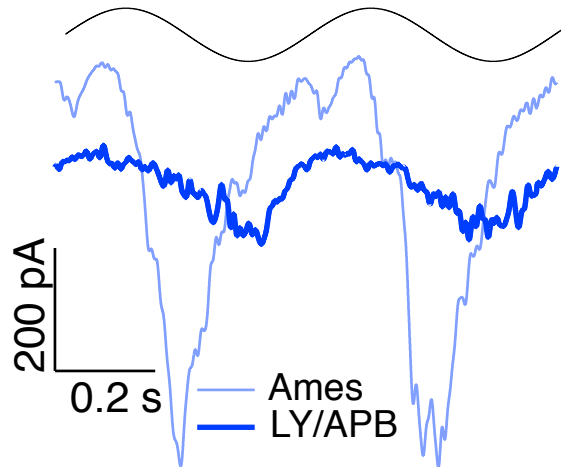

B. Cone-derived

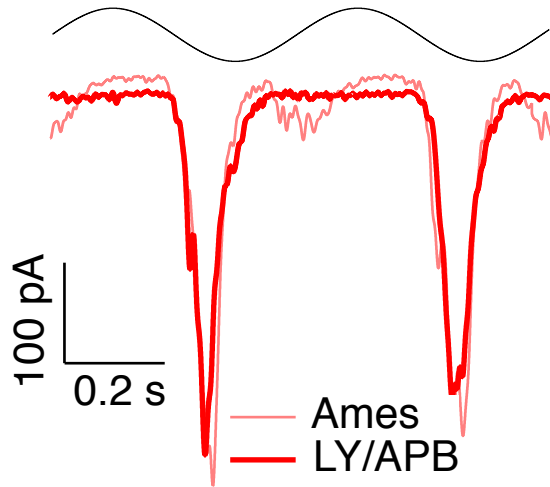

C. Collected data

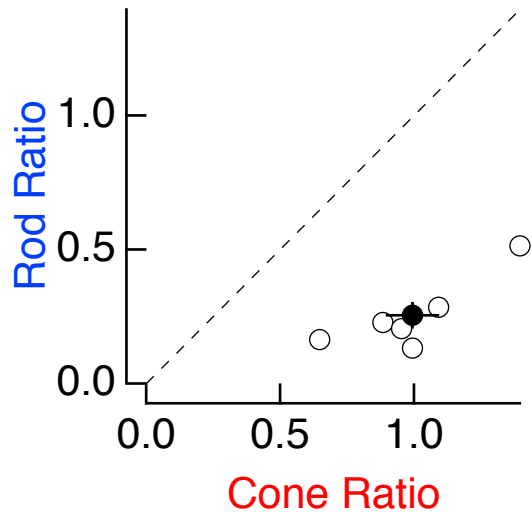

Supplement: supp [file elife-38281-supp-v1.zip]

**Darkness**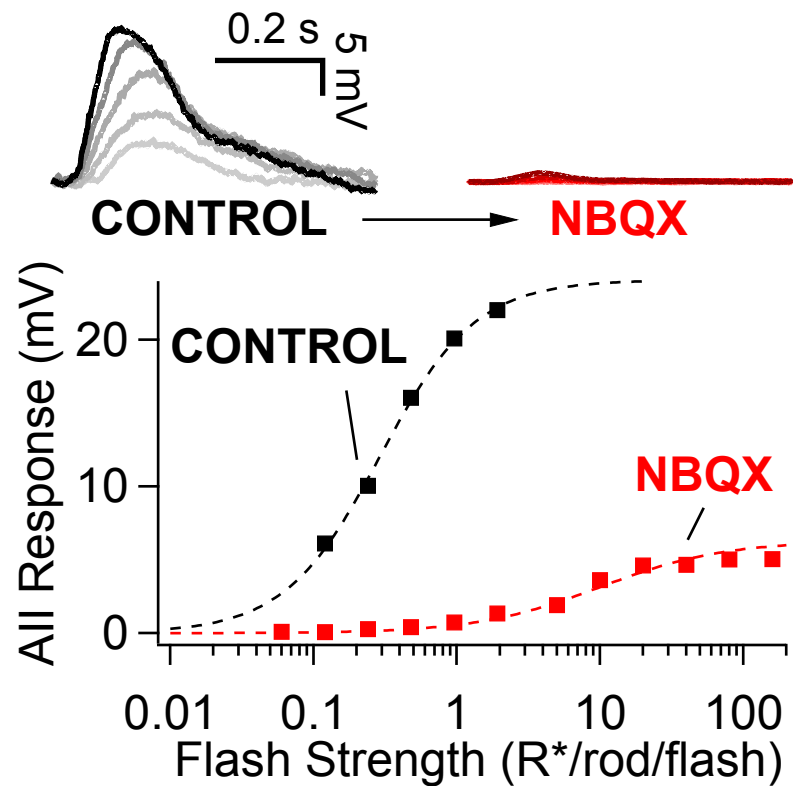**3  $R^*/\text{rod}/\text{s}$** 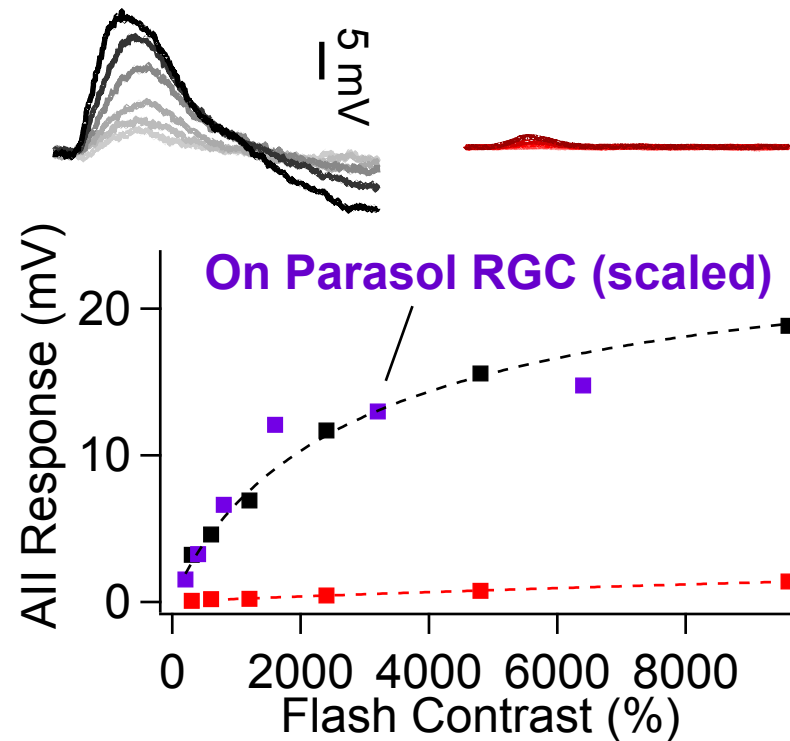**30  $R^*/\text{rod}/\text{s}$** 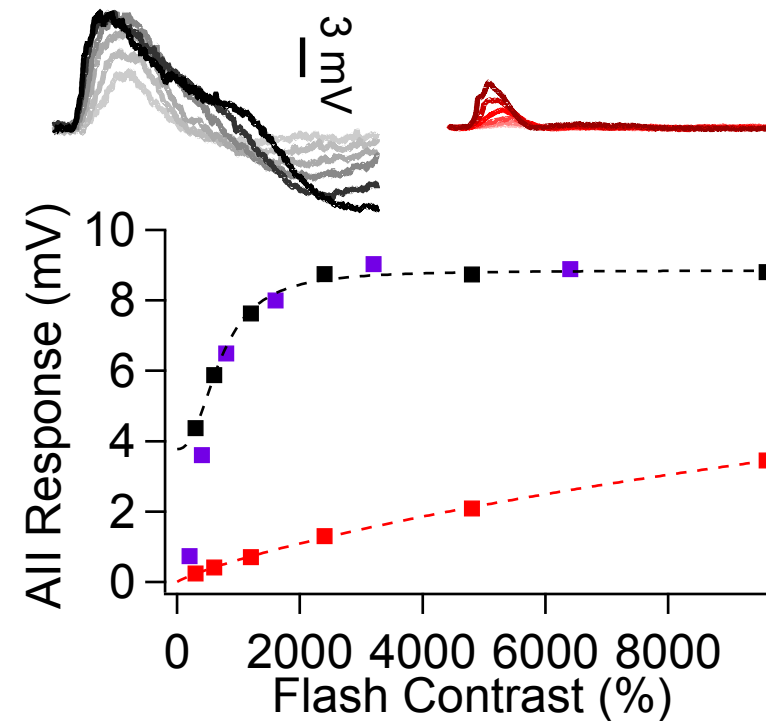**300  $R^*/\text{rod}/\text{s}$** 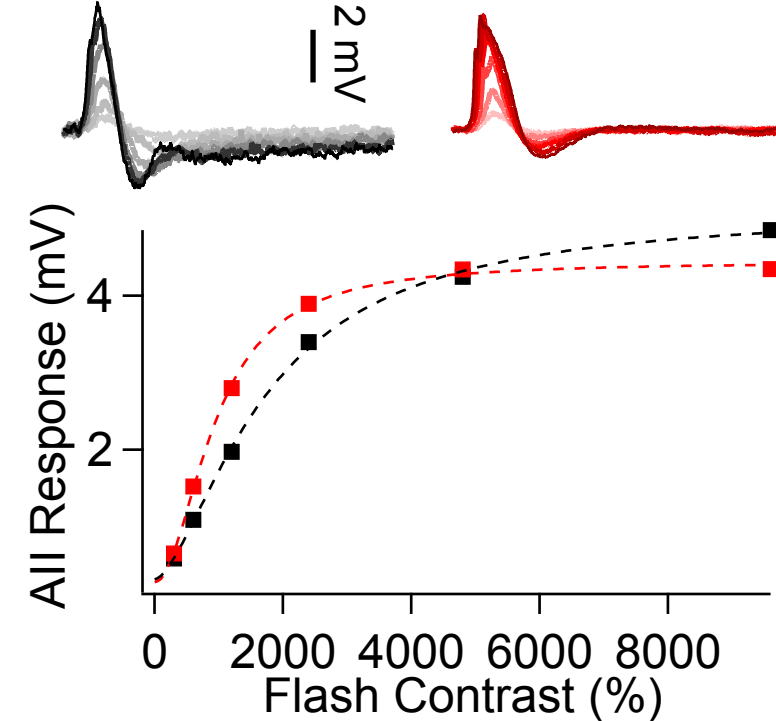

Supplement: supp [file elife-38281-supp-v1.zip]

### A. Cone flash family

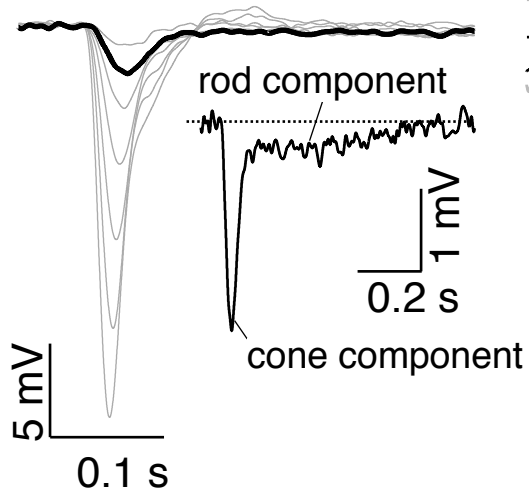

### B. Cone dim flash

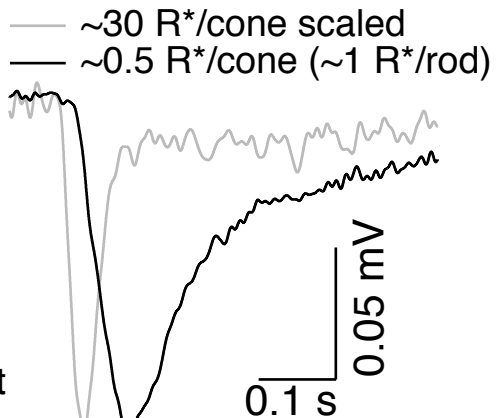

### C. Variance and mean squared

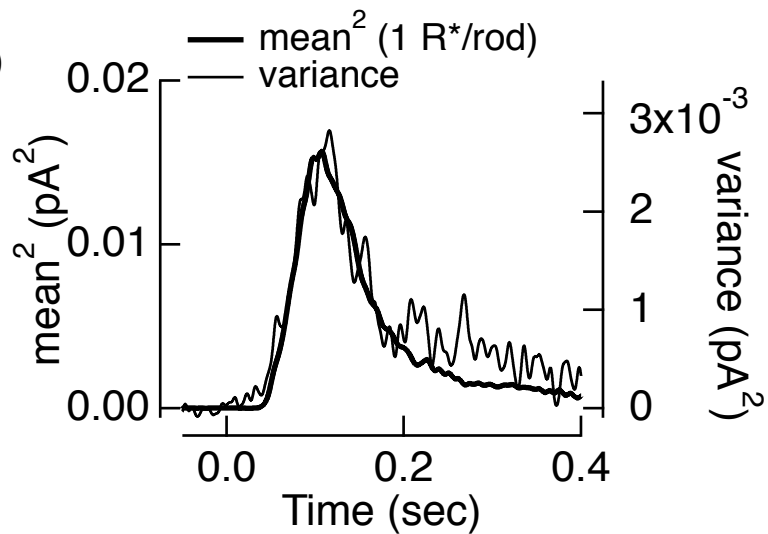

Supplement: supp [file elife-38281-supp-v1.zip]
